# Supplementary material for: Enhancement of NO release from S-nitrosoalbumin by pollution derived metal ions
Source: Royal Society of Chemistry journal article supplement (doi:10.1039/d1dt01260f), 2021-01-01
Supplement: d1dt01260f1.pdf [file d1dt01260f1.pdf]

## Enhancement of NO release from S-nitrosoalbumin by pollution derived metal ions

Anna Wądołek, Maria Oszajca\*, Wiktoria Pęczak, Małgorzata Brindell, Grażyna Stochel\*

Faculty of Chemistry, Jagiellonian University, Gronostajowa 2, 30-387 Kraków, Poland  
E-mail: [stochel@chemia.uj.edu.pl](mailto:stochel@chemia.uj.edu.pl), [maria.oszajca@chemia.uj.edu.pl](mailto:maria.oszajca@chemia.uj.edu.pl)

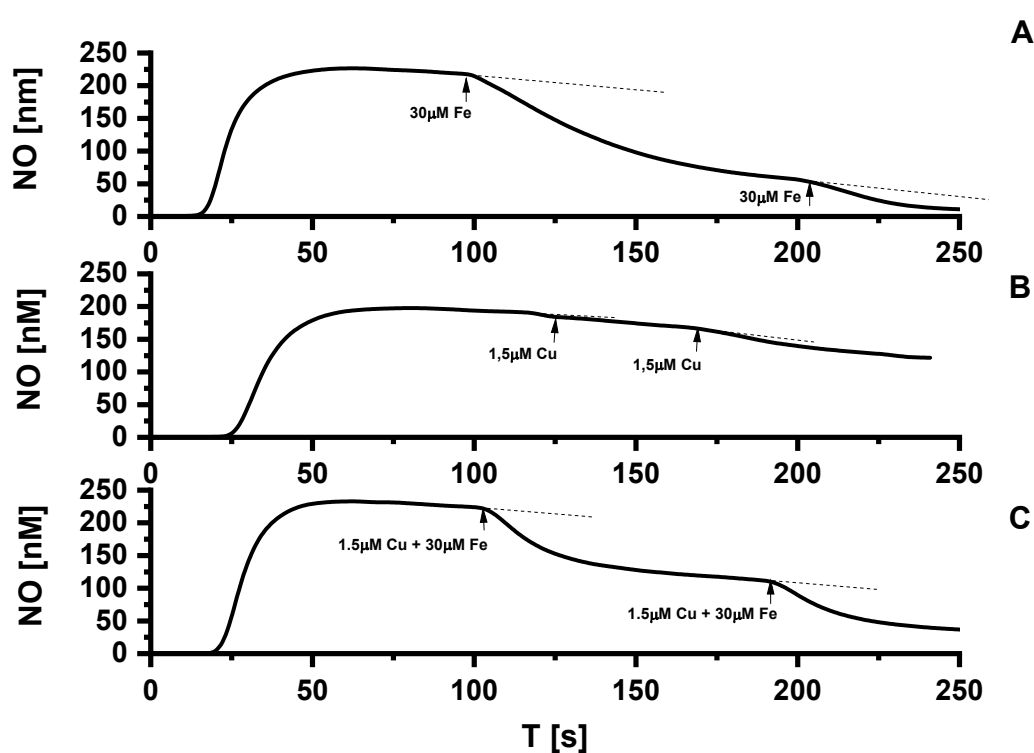

**Fig. S1** Nitric oxide signal profiles influenced by the addition of Fe<sup>3+</sup> (A), Cu<sup>2+</sup> (B) and mixture of Cu<sup>2+</sup> /Fe<sup>3+</sup>(C). Arrows indicate the addition of metal ions. Experimental conditions: [Fe<sup>3+</sup>] = 30 μM, [Cu<sup>2+</sup>] = 5 μM, [Cu<sup>2+</sup> /Fe<sup>3+</sup>] = 1.5/30 μM, Tris buffer 0.1 M, pH = 7.4, T = 37 °C, in the dark.
